# Supplementary material
Source: PubMed Central journal article supplement (PMC3740173)
Supplement: NIHMS483030-supplement-03.pdf [file NIHMS483030-supplement-03.pdf]

**Supplemental Table II**

| Primer sequences                                                              | Used for the construction of: |
|-------------------------------------------------------------------------------|-------------------------------|
| ATGCagatctAGCCGTCGCGTTTCCCACAACAGTTC<br>ATCGcttaagTCAAATCTGGGGCAGTGTGTATGGA   | pmin-eGFP-Nt                  |
| ATGCagatctAGCCGTCGCGTTTCCCACAACAGTTC<br>ATCGcttaagTCAGAAAAACATCGCACCAGTGCCA   | pmin-eGFP-Nt-SET-cys          |
| ATGCagatctGCTACCAAGGTGCAGGTCAAGCA<br>ATCGcttaagTCAACTGGCCGGTAGGCGTTCCTCG      | pmin-eGFP-SET-cys-Ct          |
| ATGCagatctGCTACCAAGGTGCAGGTCAAGCA<br>ATCGcttaagTCAGAAAAACATCGCACCAGTGCCA      | pmin-eGFP-SET-cys             |
| ATGCagatctCTGTTCAAGTCGACAAA<br>ATCGcttaagTCAACTGGCCGGTAGGCGTTCCTCG            | pmin-eGFP-cys-Ct              |
| ATGCgctagcAGCCGTCGCGTTTCCCACAACAGTTC<br>GATCgaattcTCAGAAAAACATCGCACCAGTGCC    | pET22B-FLAG- Nt-SET-cys       |
| GATCgctagcGCTACCAAGGTGCAGGTCAAGCATG<br>GATCgaattcTCAGAAAAACATCGCACCAGTGCC     | pET22B-FLAG-SET-cys           |
| ATCCgctagcAAAATGGTGAGCAAGGGCGAGGAG<br>AGTagatctGAGTCCGACTTGTACAGCTCGTCCATGCCG | ptub-mTagRFP-T-TgTUBA1        |
